# Supplementary material for: Glycosaminoglycans are potential pharmacological targets for classic DNA minor groove binder drugs berenil and pentamidine
Source: Royal Society of Chemistry journal article supplement (doi:10.1039/c5cp03153b), 2015-01-01
Supplement: c5cp03153b1.pdf [file c5cp03153b1.pdf]

*Supplementary Information*

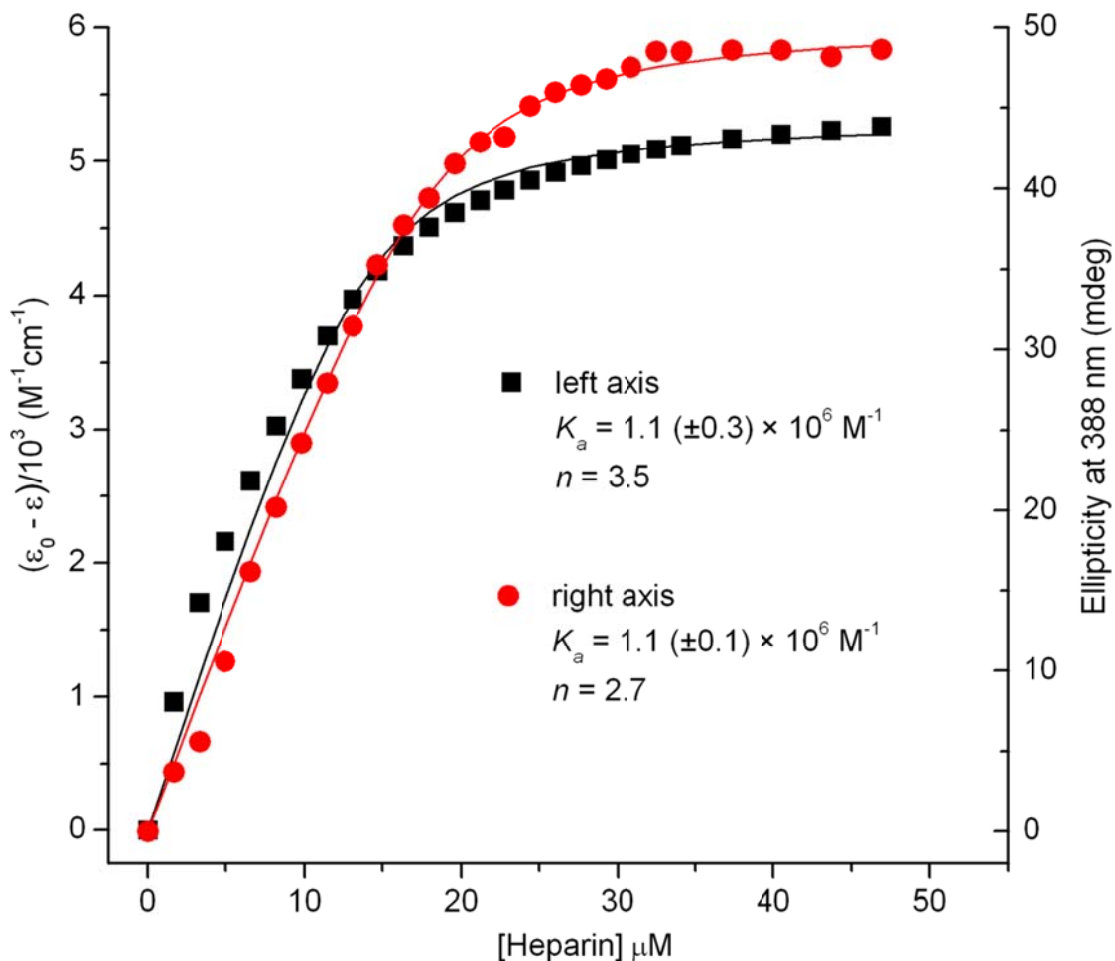

### Supplementary Figure 1

UV absorption changes and induced CD values of berenil (49  $\mu\text{M}$ ) plotted against the heparin concentration of the sample solution (50 mM phosphate buffer at pH 7.0, 80 mM  $\text{Na}^+$ , 25  $^\circ\text{C}$ ).  $\epsilon_0$ : maximum molar absorption coefficient of the main UV peak of berenil measured in heparin-free buffer solution;  $\epsilon$ : molar absorption coefficient measured at increasing concentrations of heparin. Solid lines are the results of non-linear curve fitting analysis. Estimated association constant ( $K_a$ ) and the number of berenil binding sites ( $n$ ) per a disaccharide unit are shown.

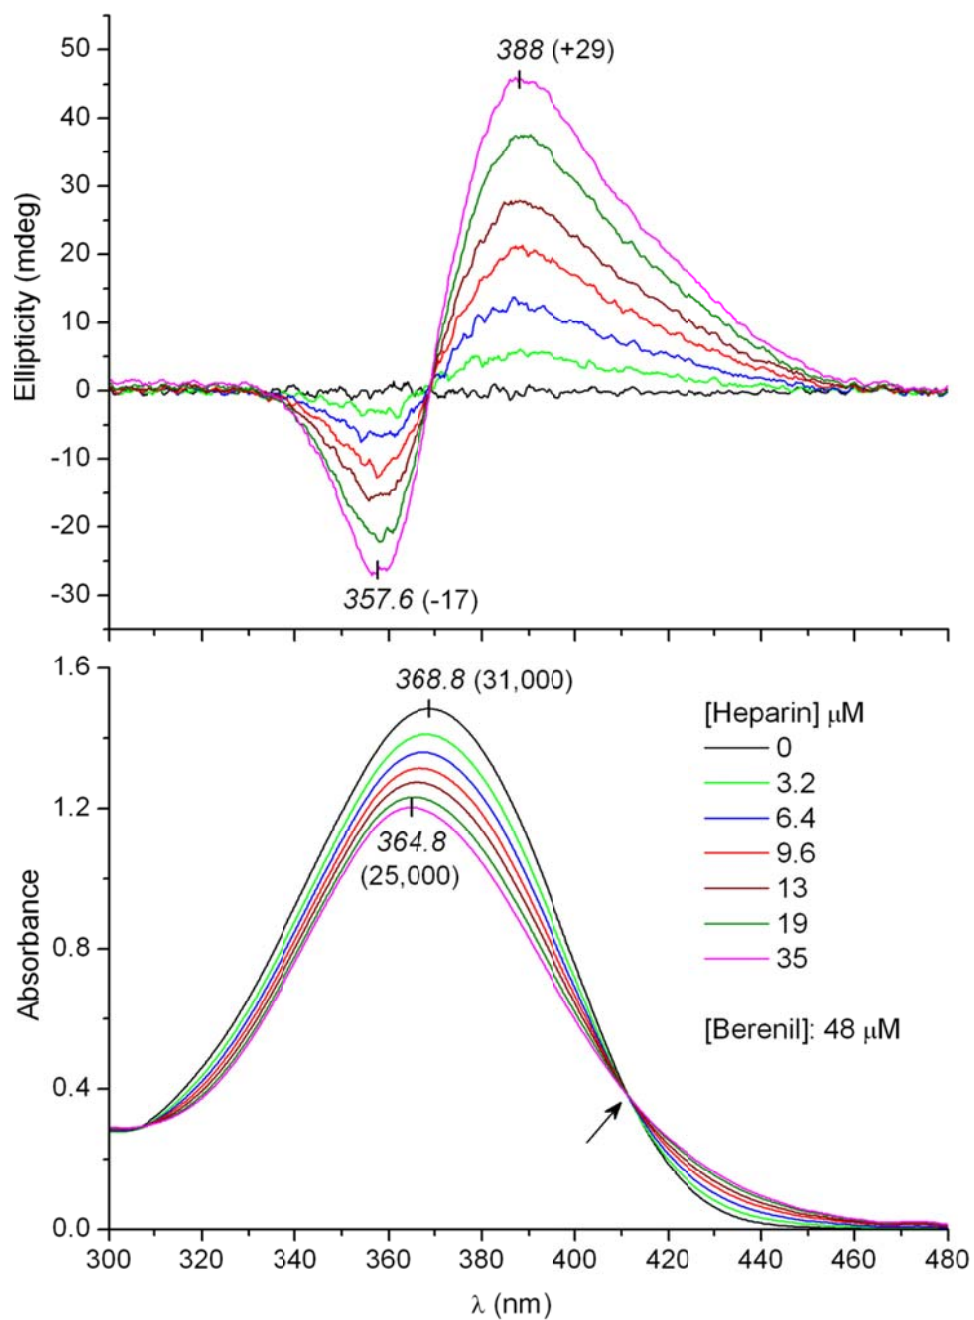

### Supplementary Figure 2

Induced CD and absorption spectra of 48  $\mu\text{M}$  berenil at increasing concentrations of heparin in deionized water (100 mM NaCl, 25  $^{\circ}\text{C}$ ). Molar absorption ( $\epsilon$ ) and circular dichroic absorption coefficients ( $\pm\Delta\epsilon$ ) calculated by using the concentration of berenil in the sample solution are shown in parentheses. Arrow denotes an isosbestic point at 411 nm.

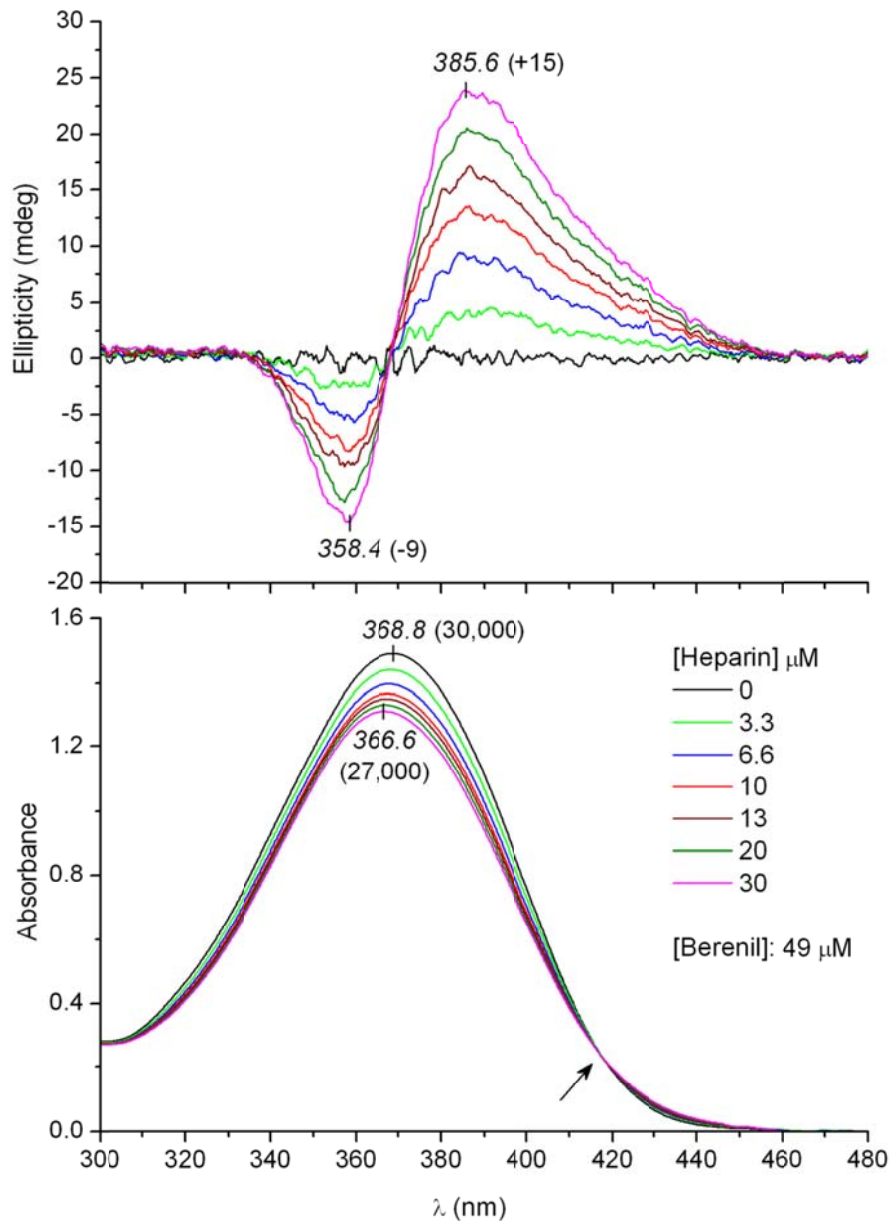

### Supplementary Figure 3

Induced CD and absorption spectra of 49  $\mu\text{M}$  berenil at increasing concentrations of heparin in pH 7.4 phosphate buffer with 140 mM  $\text{Na}^+$  (25  $^{\circ}\text{C}$ ). Molar absorption ( $\epsilon$ ) and circular dichroic absorption coefficients ( $\pm\Delta\epsilon$ ) calculated by using the concentration of berenil in the sample solution are shown in parentheses. Due to the time-dependence of the CD curves, each scan was performed with 15 min. delay after the addition of heparin aliquots. Arrow denotes an isosbestic point at 417 nm.

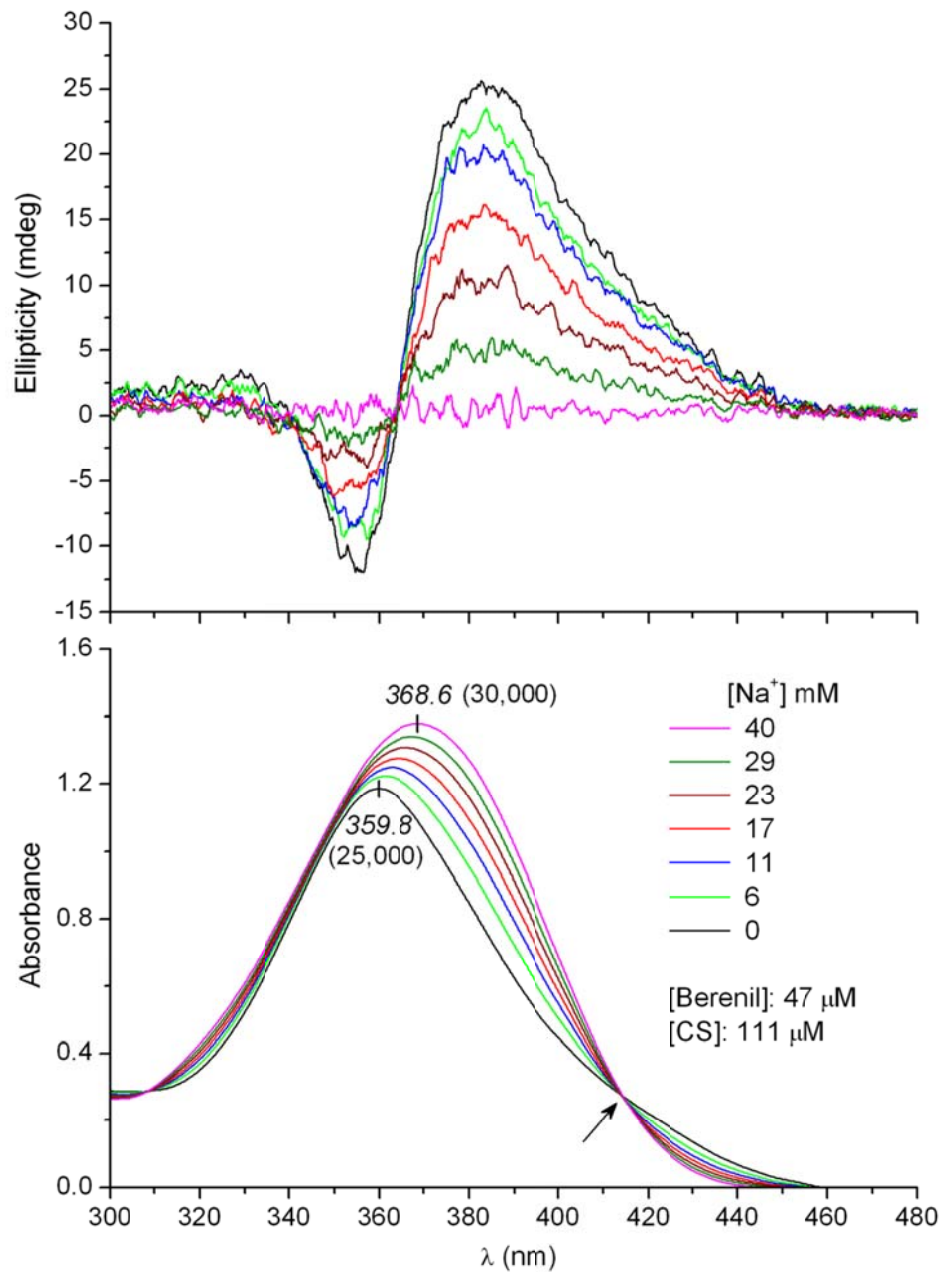

#### Supplementary Figure 4

Effect of increasing sodium ion concentration on the ICD and UV absorption spectrum of berenil in CS solution (deionized water, 25 °C). Molar absorption coefficients ( $\epsilon$ ) of berenil are shown in parentheses. Arrow denotes an isobestic point at 414 nm.

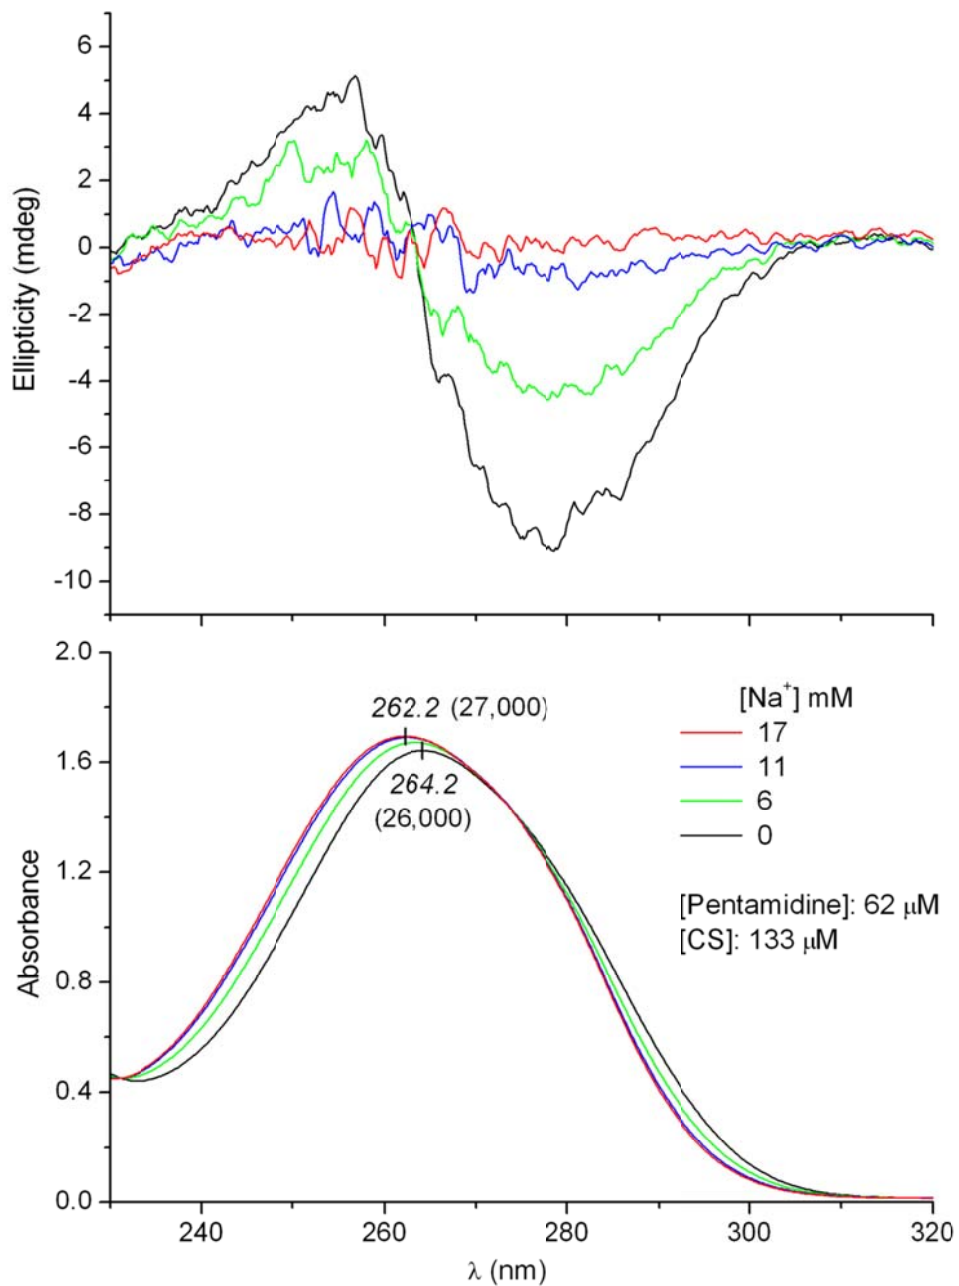

### Supplementary Figure 5

Effect of increasing sodium ion concentration on the ICD and UV absorption spectrum of pentamidine in chondroitin 6-sulfate solution (deionized water, 25 °C). Molar absorption coefficients ( $\epsilon$ ) of the drug are shown in parentheses.

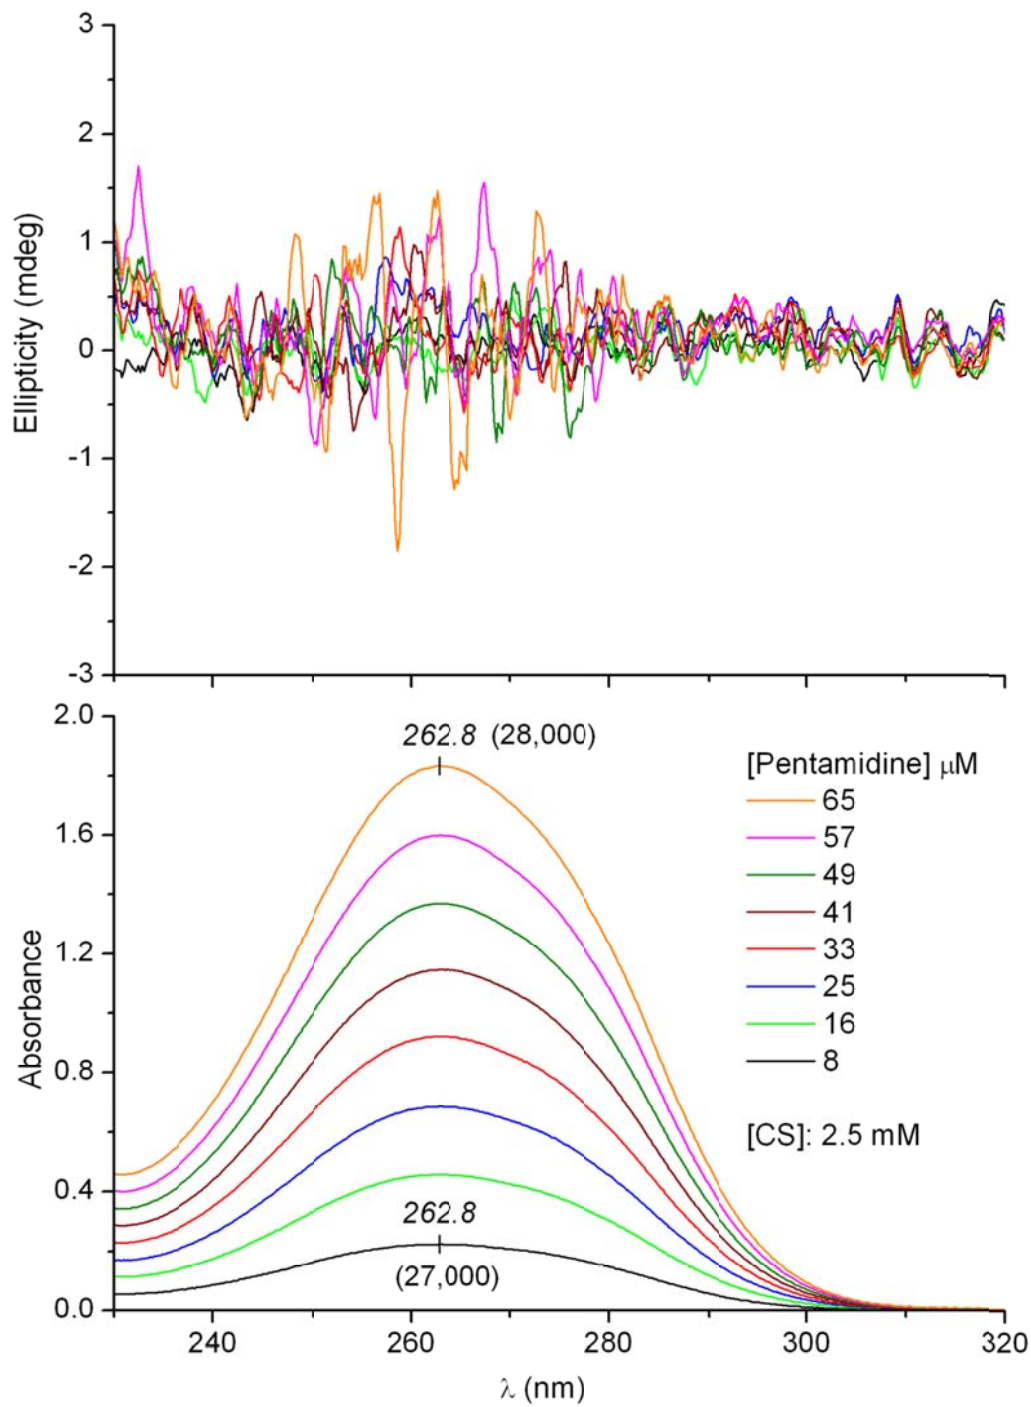

### Supplementary Figure 6

CD and absorption spectra of pentamidine in aqueous solution of chondroitin 6-sulfate (25 °C). Molar absorption coefficients ( $\epsilon$ ) are shown in parentheses.

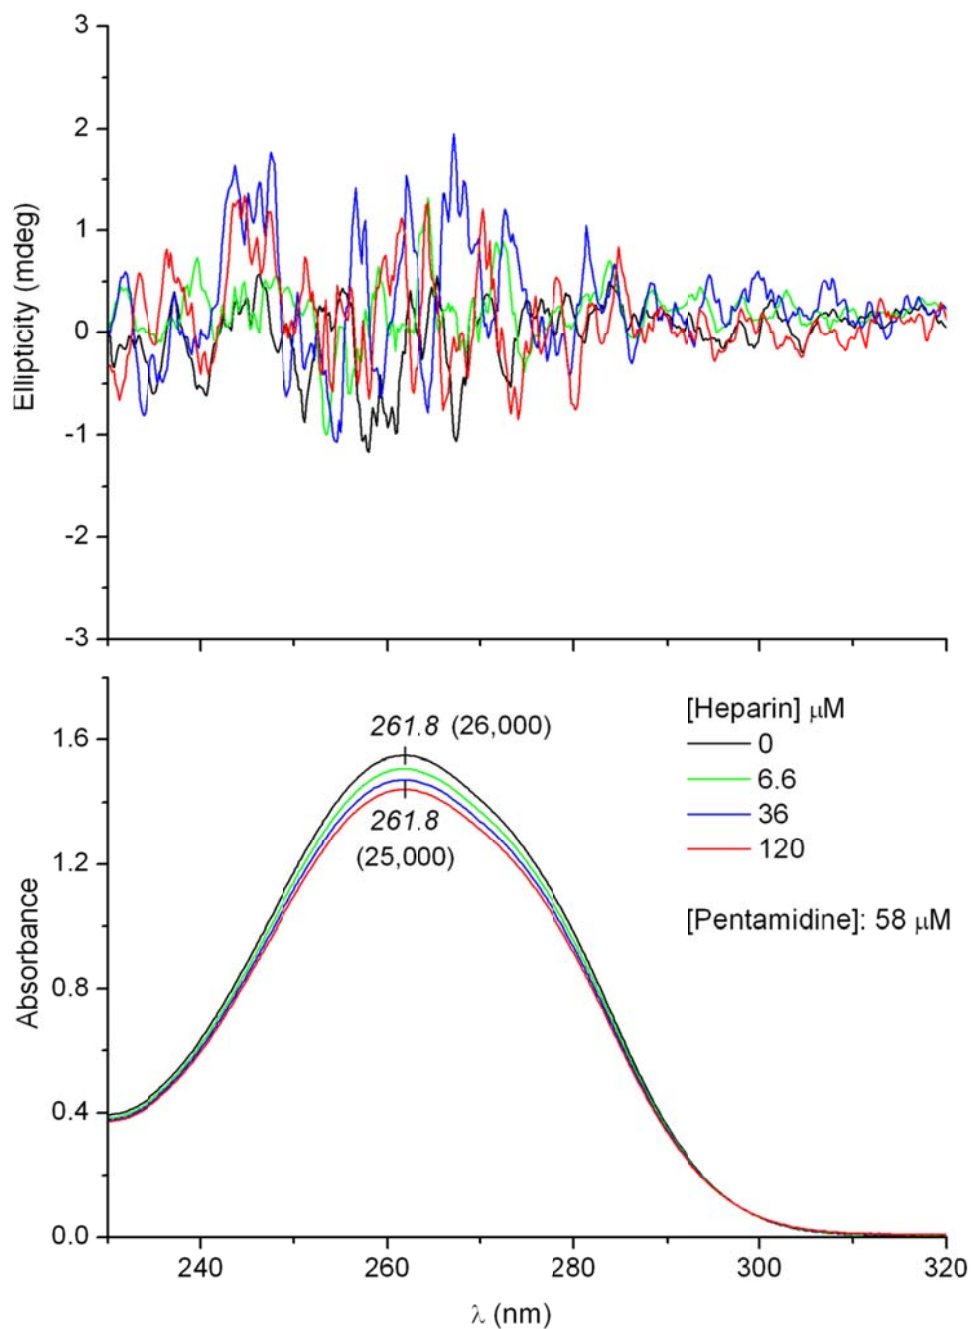

### Supplementary Figure 7

CD and absorption spectra of 58  $\mu$ M pentamidine at increasing concentrations of heparin in pH 7.4 phosphate buffer with 140 mM  $\text{Na}^+$  (25  $^{\circ}$ C). Molar absorption coefficients ( $\epsilon$ ) are shown in parentheses.
